# Supplementary material
Source: Springer Nature journal article supplement (https://www.springermedizin.de/resource/supplementary/13017_2009_171_MOESM5_ESM.pdf/9635616)

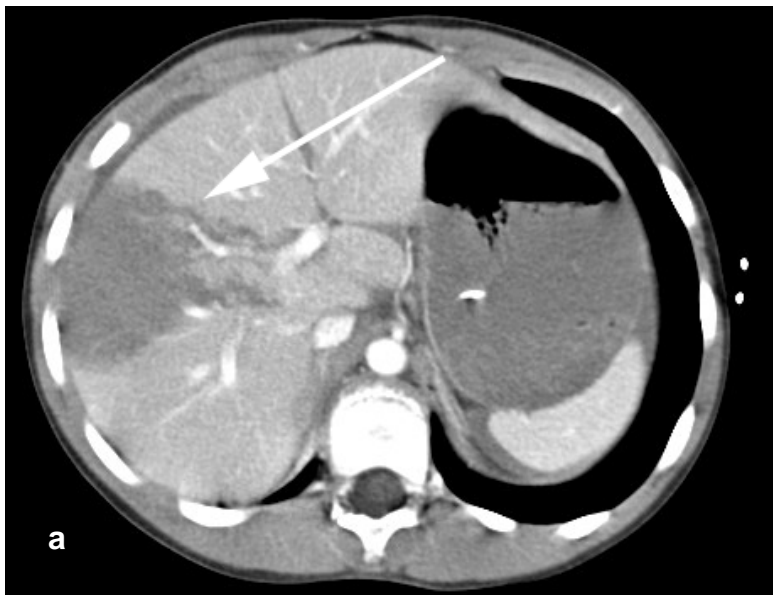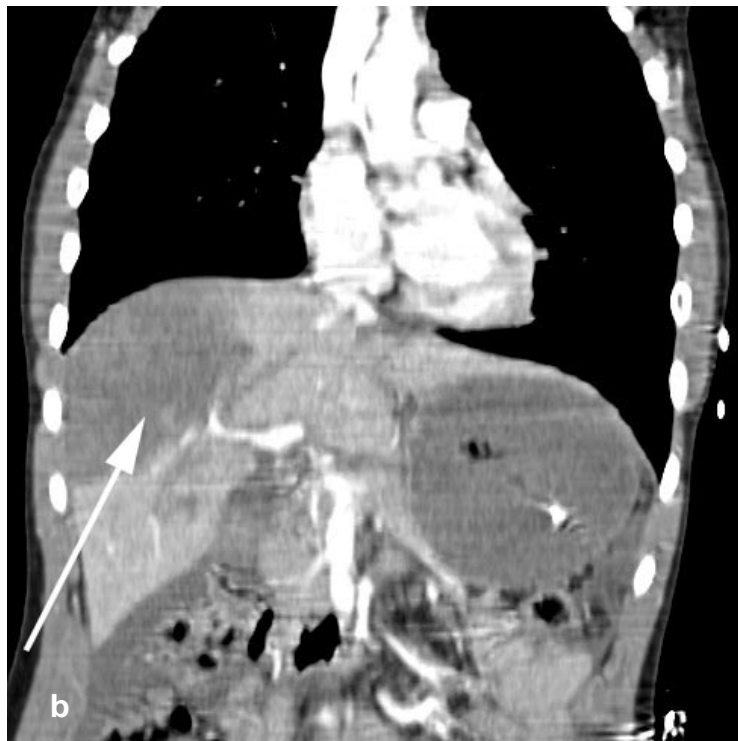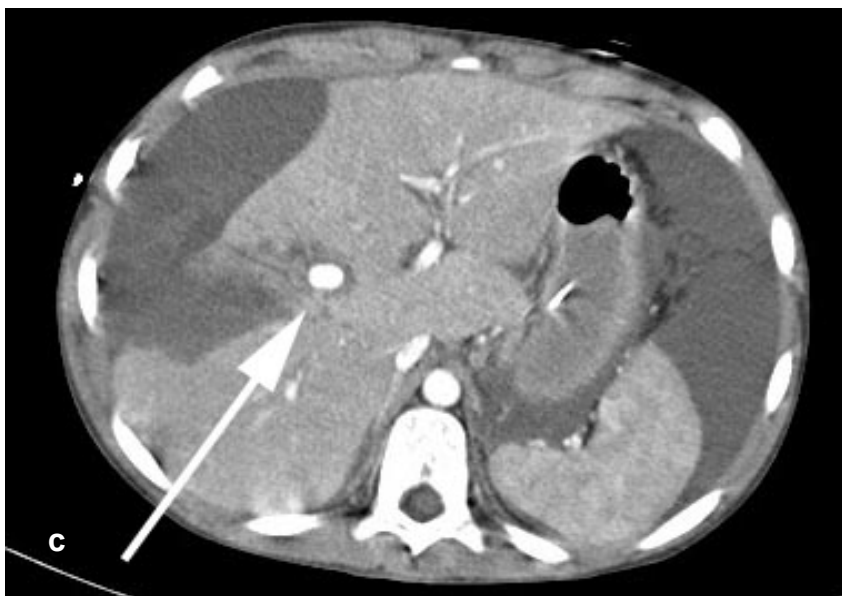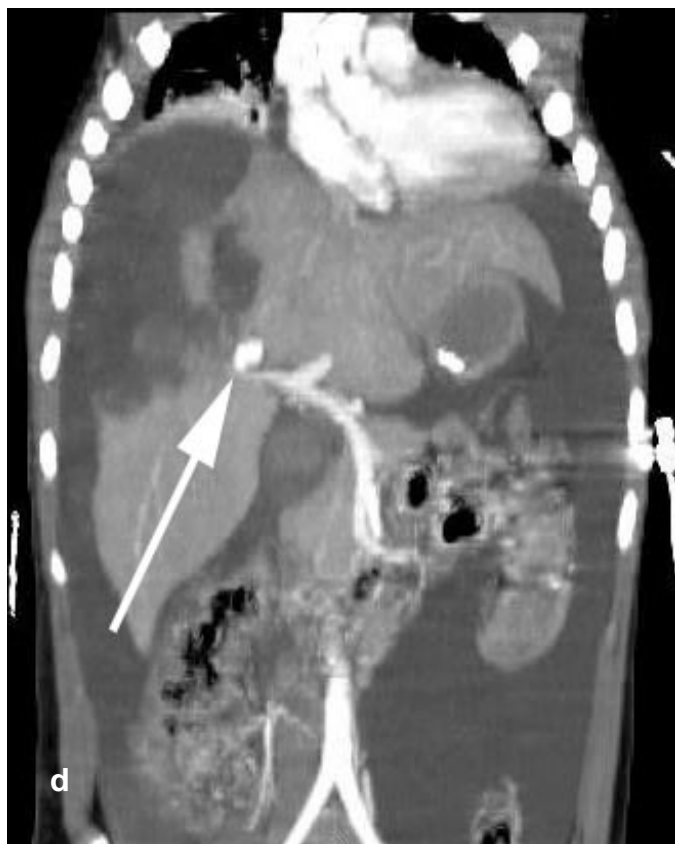

Supplement: MOESM5 [file 9635616]
